# Supplementary figures and images for: Engineering thermostable affinity proteins for use in high-throughput immunoassay formats
Source: Royal Society of Chemistry journal article supplement (doi:10.1039/d3sd00041a), 2023-01-01

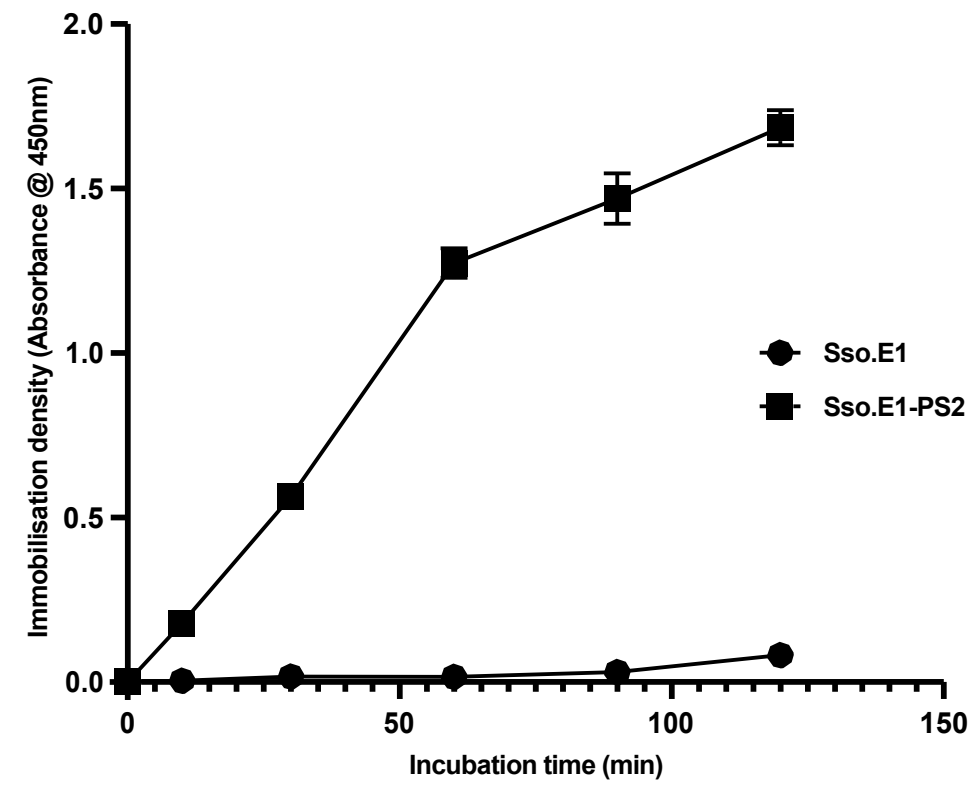

**Figure S1**

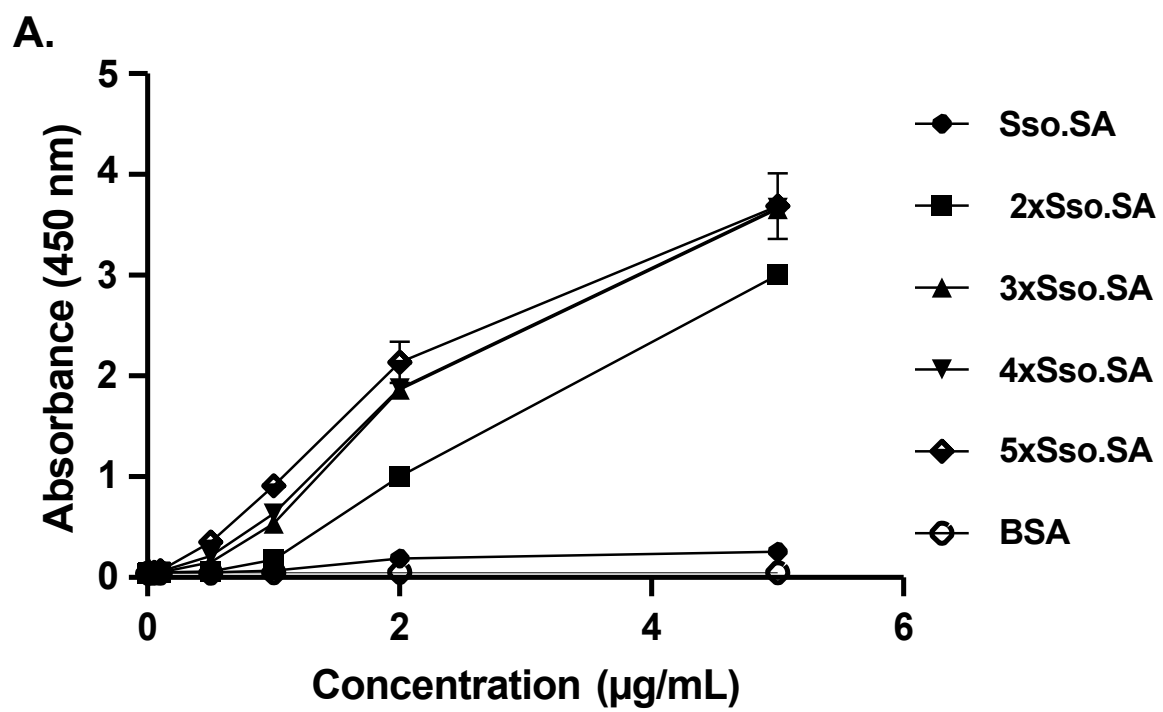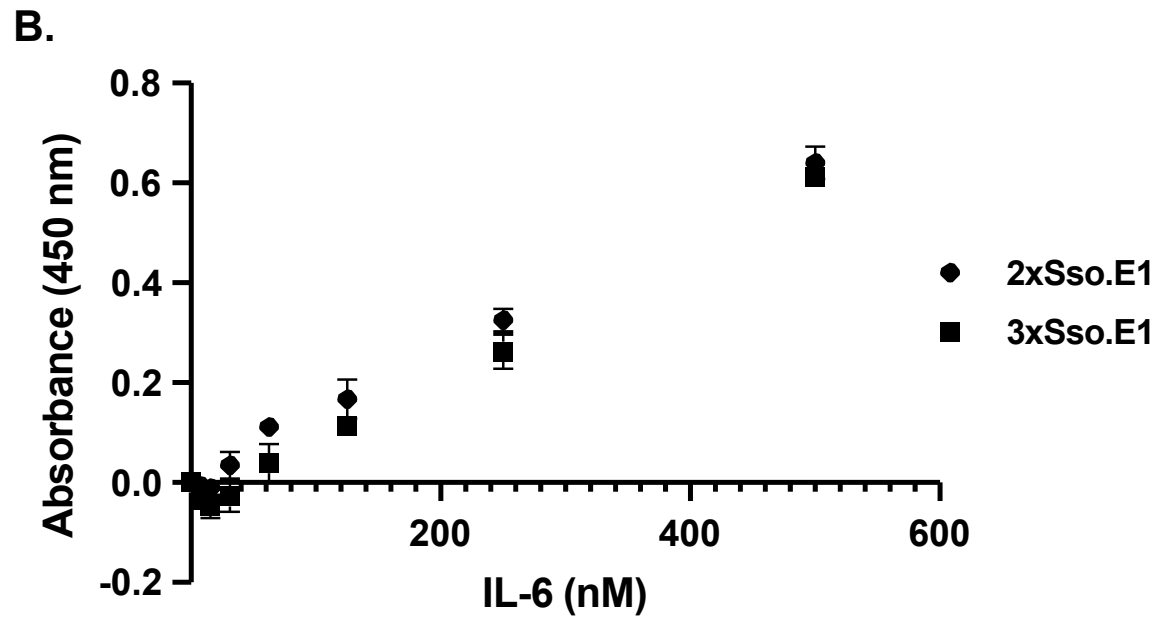

**Figure S2**

A.

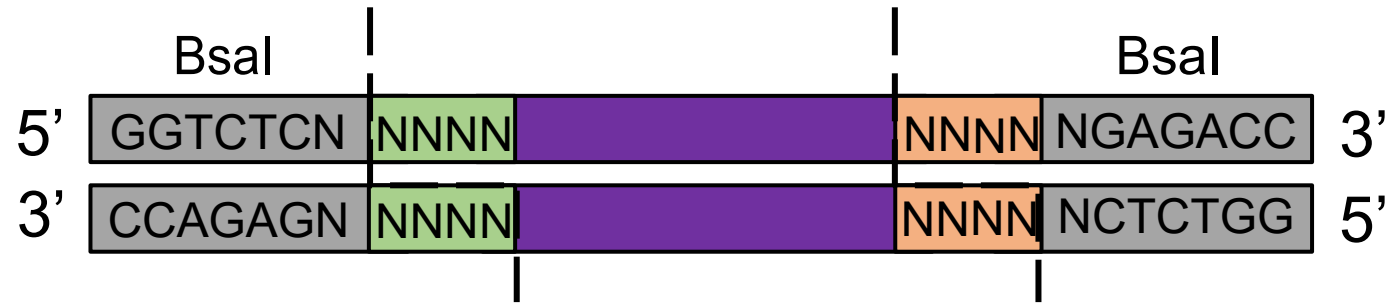

A.

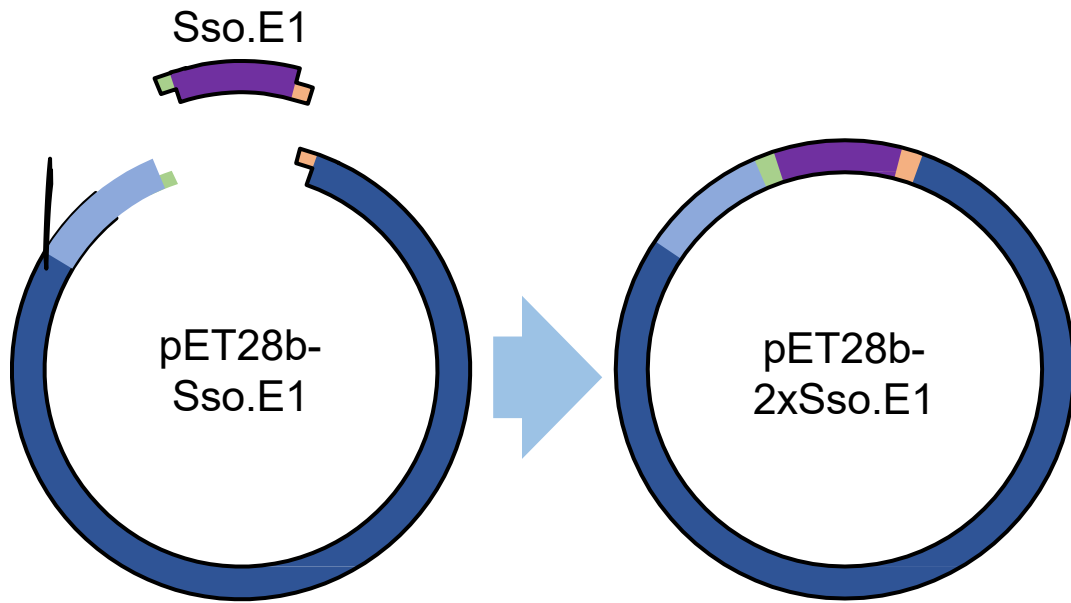

C.

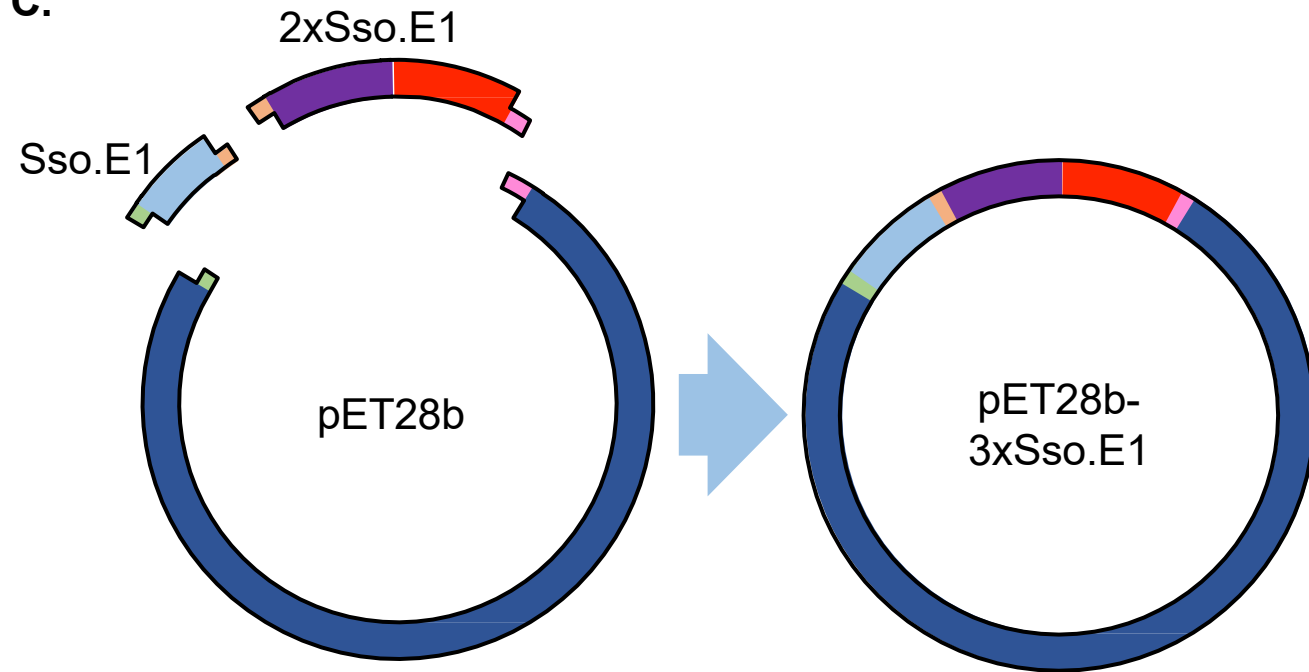

Figure S3

Supplement: d3sd00041a2.pdf [file d3sd00041a2.pdf]
